1 Cardiac enriched BAF chromatin remodeling complex subunit Baf60c regulates gene  
2 expression programs essential for heart development and function

3

4 Xin Sun<sup>1,2,12</sup>, Swetansu K. Hota<sup>3,4</sup>, Yu-Qing Zhou<sup>5</sup>, Stefanie Novak<sup>6</sup>, Dario Miguel-  
5 Perez<sup>3,4</sup>, Danos Christodoulou<sup>7</sup>, Christine E. Seidman<sup>7,8</sup>, J.G. Seidman<sup>7</sup>, Carol C.  
6 Gregorio<sup>6</sup>, R. Mark Henkelman<sup>5,9</sup>, Janet Rossant<sup>1,2</sup>, and Benoit G. Bruneau<sup>3,4,10,11</sup>

7

8 1. Program in Developmental and Stem Cell Biology, The Hospital for Sick Children,  
9 Toronto, ON, M5G 1X8 Canada

10 2. Department of Molecular Genetics, University of Toronto, Toronto, ON M5S 1A8  
11 Canada

12 3. Gladstone Institutes, San Francisco, CA, 94158 USA

13 4. Roddenberry Center for Stem Cell Biology and Medicine at Gladstone, San Francisco,  
14 CA 94158, USA

15 5. The Mouse Imaging Centre, The Hospital for Sick Children, Toronto, ON, M5G 1X8  
16 Canada

17 6. Department of Cellular and Molecular Medicine, University of Arizona, Tucson, AZ  
18 85724

19 7. Department of Genetics, Harvard Medical School, Boston, MA 02115

20 8. Howard Hughes Medical Institute, Brigham and Women's Hospital, Boston, MA 02115

21 9. Department of Medical Biophysics, University of Toronto, Toronto, ON M5S 1A8  
22 Canada

23 10. Department of Pediatrics, University of California, San Francisco, CA 94143 USA

24 11. Cardiovascular Research Institute, University of California, San Francisco, CA 94158  
25 USA

26 12. Current address: Department of Physiology, Anatomy and Genetics, University of  
27 Oxford.

28

29 Correspondence: B.G.B. benoit.bruneau@gladstone.ucsf.edu

30

31

32

33

34

## 35 **Abstract**

36

37 How gene networks controlling organ-specific properties are modulated by chromatin  
38 remodeling complexes is not well understood. *Baf60c* (*Smarcd3*) encodes a cardiac-  
39 enriched subunit of the SWI/SNF-like BAF chromatin complex. Its role throughout heart  
40 development is not fully understood. We show that constitutive loss of *Baf60c* leads to  
41 embryonic cardiac hypoplasia and pronounced cardiac dysfunction. Conditional deletion  
42 of *Baf60c* in cardiomyocytes results in postnatal dilated cardiomyopathy with impaired  
43 contractile function. *Baf60c* regulates a gene expression program that includes genes  
44 encoding contractile proteins, modulators of sarcomere function, and cardiac metabolic  
45 genes. Many of the genes deregulated in *Baf60c* null embryos are targets of the  
46 MEF2/SRF co-factor Myocardin (MYOCD). In a yeast two-hybrid screen we identify  
47 MYOCD as a BAF60c interacting factor; we show that BAF60c and MYOCD directly and  
48 functionally interact. We conclude that Baf60c is essential for coordinating a program of  
49 gene expression that regulates the fundamental functional properties of cardiomyocytes.

50

## 51 **Introduction**

52 Transcription factor networks control cardiac morphogenesis and cell specification  
53 (Bruneau, 2013; Evans et al., 2010) including the coordinated regulation of genes  
54 encoding the proteins involved in sarcomere function (Creemers et al., 2006; Niu et al.,  
55 2008). While undergoing complex morphogenetic changes, the developing heart  
56 functions to support the embryonic circulation. The contractile function of the heart  
57 adapts quickly to the dramatic changes in circulation that occur after birth, and  
58 subsequently must adapt to fluctuating physiology and stress. The transcriptional  
59 regulation of cardiac gene expression continues during postnatal heart growth and  
60 cardiomyocyte maintenance (Huang et al., 2009; Oka et al., 2006).

61 Chromatin remodeling complexes are critical regulators of cardiac gene expression, in  
62 many cases modulating the activity of DNA-binding transcription factors (Chang and  
63 Bruneau, 2012). For example, histone deacetylases (HDACs) and Bromodomain-  
64 containing factors play important roles in cardiac gene regulation and remodeling, and  
65 have been proposed as potential therapeutic drug targets (Anand et al., 2013; McKinsey,  
66 2012). BRG1/BRM-Associated Factor (BAF) complexes are ATP-dependent chromatin

67 remodeling complexes related to the yeast SWI/SNF complex, and are indispensable for  
68 mammalian development (Hota and Bruneau, 2016). BAF complexes orchestrate many  
69 aspects of heart development, and genetically interact with cardiac transcription factors  
70 to finely modulate cardiac gene expression (Hang et al., 2010; Takeuchi et al., 2011).  
71 Combinatorial assembly of different polymorphic subunits can generate hundreds of  
72 potential BAF complexes, and offer precise control of developmental processes (Chang  
73 and Bruneau, 2012; Ho and Crabtree, 2010). BAF60c (also known as SMARCD3) is a  
74 polymorphic subunit of the BAF complex, which is expressed preferentially in the  
75 developing heart (Lickert et al., 2004). In vivo RNAi knockdown in mouse embryos  
76 suggested that *Baf60c* is essential for embryonic heart development (Lickert et al., 2004),  
77 and together with the cardiac transcription factors TBX5, NKX2-5 and GATA4, BAF60c  
78 can induce non-cardiac mesoderm to differentiate into cardiomyocytes (Lou et al., 2011;  
79 Takeuchi and Bruneau, 2009).

80 In this study, we examined the role of *Baf60c* in embryonic and postnatal heart  
81 development using a *Baf60c* conditional knockout mouse line. We show that *Baf60c* is  
82 essential for cardiac growth and cardiomyocyte function at several stages of embryonic  
83 development, by regulating broad networks of genes encoding proteins essential for  
84 function of the contractile apparatus. Many of the dysregulated genes are targets of the  
85 MEF2 co-factor MYOCD, and we identify MYOCD as a BAF60c-interacting protein. Our  
86 work shows that *Baf60c* serves as an important modulator of the fundamental program  
87 of gene expression essential for cardiac structure and function.

88

## 89 **Results**

90

### 91 **Construction of *Baf60c* conditional knockout mouse line.**

92 *Baf60c* is expressed at E7.5 in the early cardiac precursors of the cardiac crescent, and  
93 its expression is maintained throughout development in the myocardium (Lickert et al.,  
94 2004). In order to understand the function of *Baf60c* at different developmental stages,  
95 we developed a conditional allele of *Baf60c* in the mouse. A targeting construct with a  
96 pair of loxP sites flanking exon 1-4 was introduced into embryonic stem (ES) cells (Fig  
97 1A). Transgenic mice generated from the targeted ES cells (*Baf60c*<sup>fllox/+</sup>) have normal  
98 phenotypes and life span and thus are treated as wild type. By crossing with pCAGGS-  
99 Cre mice which constitutively express Cre recombinase, exons 1-4 of *Baf60c* were

100 deleted to generate *Baf60c*<sup>+/-</sup> mice (Fig 1A). No obvious defects were observed in  
101 *Baf60c*<sup>+/-</sup> mice. Homozygous null *Baf60c*<sup>-/-</sup> embryos were recovered at E9.5 (Fig 1B), and  
102 by whole mount in-situ hybridization no *Baf60c* mRNA was detectable in *Baf60c*<sup>-/-</sup>  
103 embryos (Fig 1C).

#### 104 ***Baf60c* deletion results in a hypoplastic heart and embryonic demise.**

105 *Baf60c*<sup>-/-</sup> embryos were recovered alive and with roughly normal morphology at different  
106 stages of timed pregnancy until E12.5-E14.5. At E14.5, most *Baf60c*<sup>-/-</sup> embryos were  
107 dead, with broad regions of hemorrhage. Backcrossing into C57Bl/6 for 10 generations  
108 led to a more consistent phenotype, with survival only until E12.5-13.5. To determine  
109 the cause of embryonic death, and to identify potential cardiac phenotypes, *Baf60c*<sup>-/-</sup>  
110 embryos were harvested for histological analysis. Optical projection tomography showed  
111 that mixed background E12.5 *Baf60c*<sup>-/-</sup> embryonic hearts had dilated inner chambers and  
112 underdeveloped interventricular septa (Fig 2A). At E11.5 *Baf60c*<sup>-/-</sup> C57Bl/6 embryonic  
113 hearts had a more severe and penetrant phenotype, with a thin compact layer and fewer  
114 or less well developed trabeculae (Fig 2B), impaired atrioventricular cushion formation,  
115 and reduced atrial septum growth. In the few surviving E14.5 *Baf60c*<sup>-/-</sup> mixed  
116 background embryos, ventricular free walls were much thinner than WT (Fig 2C) and the  
117 interventricular septum was disorganized, leading to ventricular septal defects. Based on  
118 the intrinsic cardiac phenotypes, we conjectured that circulatory failure and hemorrhage  
119 were the result of impaired cardiac function of *Baf60c*<sup>-/-</sup> embryos.

120 To identify the possible cause of cardiac hypoplasia in *Baf60c* knockouts, proliferation of  
121 cardiomyocytes was assessed by staining with Ki67 antibody. Immunostaining detected  
122 fewer Ki67+ cardiomyocytes in E12.5 *Baf60c*<sup>-/-</sup> ventricles than in WT (Fig 2D).  
123 Quantitation confirmed that in WT hearts, there were 32±9% Ki67+ ventricular  
124 cardiomyocytes, while in *Baf60c*<sup>-/-</sup> hearts 25±5% were positive (n=4; *P*<0.05).

125 The embryonic heart begins to pump blood from the linear heart tube stage onwards,  
126 and its contractile function is essential for fetal life. To determine if cardiac function was  
127 affected by *Baf60c* deletion, we used high frequency ultrasound echocardiography (Zhou  
128 et al., 2002) to evaluate contractile parameters of E13.5 mixed background embryos in  
129 utero (Table 1). No regurgitation between atria and ventricles were observed in *Baf60c*<sup>-/-</sup>  
130 embryos, suggesting that cardiac valves had formed and were fully functional. However,

131 the left ventricle fraction shortening (LVFS) of *Baf60c*<sup>-/-</sup> hearts was reduced, suggesting  
132 impaired systolic function. The inter-ventricular septal fractional thickening (IVSFT) was  
133 lower than in the hearts of WT and *Baf60c*<sup>+/-</sup> embryos indicating reduced myocardial  
134 contraction. The E/A ratios of *Baf60c*<sup>-/-</sup> hearts for both the left and right ventricles were  
135 also significantly increased. This may indicate impaired cardiac relaxation (Zhou et al.,  
136 2003). Overall, echocardiography showed that loss of *Baf60c* affected the morphology  
137 and dimensions of the heart, and concomitantly its contractile function.

138 We assessed the tissue-specificity of the *Baf60c*<sup>-/-</sup> phenotype by crossing *Baf60c*<sup>flox/flox</sup>  
139 mice with *Nkx2-5::Cre* mice. *Nkx2-5::Cre* deletes loxP-flanked DNA from E8.0 in all  
140 cardiac precursors (Moses et al., 2001). *Nkx2-5::Cre::Baf60c*<sup>flox/-</sup> mice had morphological  
141 defects similar to those found in the least severely affected *Baf60c*<sup>-/-</sup> embryos (Fig 3),  
142 indicating that the constitutive null phenotype reflects primary loss of *Baf60c* in the  
143 developing heart, but also potentially an earlier function in precursors that do not yet  
144 express *Nkx2-5* (Devine et al., 2014).

#### 145 **Loss of Baf60c in cardiomyocytes results in postnatal cardiomyopathy**

146 After birth, heart development switches from cell proliferation to hypertrophic growth.  
147 The structure and physiological function of the myocardium undergo a series of changes  
148 to adapt to a new hemodynamic environment. We deleted *Baf60c* in the myocardium at  
149 later developmental stages by crossing the *Baf60c*<sup>flox/flox</sup> allele with *Myh6::Cre* (Agah et  
150 al., 1997). This manipulation bypassed the embryonic lethality of the constitutive deletion,  
151 as *Baf60c*<sup>flox/-</sup>; *Myh6::Cre* (*Baf60c*<sup>Myh6KO</sup>) mice were born alive and showed no obvious  
152 morphological changes before postnatal day (P) 7. After P7, some of the *Baf60c*<sup>Myh6KO</sup>  
153 pups were growth-delayed compared with their littermates and died before weaning.  
154 Other *Baf60c*<sup>Myh6KO</sup> mice survived after weaning without obvious morphological defects,  
155 but at ~4 to 6 weeks exhibited symptoms of heart failure, including weight loss, reduced  
156 activity level, hunched back and labored breath. The remaining *Baf60c*<sup>Myh6KO</sup> mice  
157 appeared normal, but died suddenly. All *Baf60c*<sup>Myh6KO</sup> mice died before 4 months of age  
158 (Fig 4A).

159 To investigate the reason for the early mortality in *Baf60c*<sup>Myh6KO</sup> mice, their hearts were  
160 dissected at different ages for morphology and histology analysis. At all the observed  
161 stages (P10, P21 and 8 weeks), the hearts of *Baf60c*<sup>Myh6KO</sup> mice were enlarged

162 compared with the controls (Fig 4B). Histology revealed chamber dilation (Fig 4B).  
163 Masson's trichrome staining detected broad myocardium interstitial fibrosis in the  
164 *Baf60c<sup>Myh6KO</sup>* myocardium, while this was not observed in any other genotypes (Fig 4B,  
165 lower panels). A high level of apoptosis was also detected in myocardium of adult  
166 *Baf60c<sup>Myh6KO</sup>* mice (Fig 4C).

167 The chamber dilation and fibrosis observed in the hearts of *Baf60c<sup>Myh6KO</sup>* mice raised the  
168 question of whether cardiac function was also affected. We measured cardiac contractile  
169 function of 8-week old mice that lacked outward signs of heart failure or growth delay,  
170 using high frequency echocardiography (Table 2, n=6). Confirming the histological  
171 results, the left ventricles of *Baf60c<sup>Myh6KO</sup>* mice were prominently dilated, and the anterior  
172 and posterior ventricle walls of *Baf60c<sup>Myh6KO</sup>* mice were thinner and the chamber  
173 contraction ratio decreased. The aortic time-velocity integral (TVI, which measures the  
174 distance traveled by a volume of blood during a time interval) increased, probably  
175 because of the enlarged ventricle volume. The fraction shortening (FS) and cardiac  
176 output was reduced, consistent with the cardiac failure symptoms of *Baf60c<sup>Myh6KO</sup>* mice.  
177 We performed electrocardiogram analysis to measure the conduction function of  
178 *Baf60c<sup>Myh6KO</sup>* mice (Fig 4D, Table 3, n=5-6). Compared with other genotypes,  
179 *Baf60c<sup>Myh6KO</sup>* mice had significantly slower heart rates, shortened conduction time  
180 through the AV node (PR interval), and prolonged QRS duration, suggesting longer  
181 depolarization-repolarization time of the ventricle. P height, which indicates atrial  
182 depolarization, was reduced. Thus, clear and significant conduction defects accompany  
183 contractile deficiency in *Baf60c<sup>Myh6KO</sup>* mice.

#### 184 **Myofibrillar defects of Baf60c KO cardiomyocytes.**

185 The cardiac structural and functional defects in *Baf60c<sup>-/-</sup>* are a reflection of an underlying  
186 cellular defect. To address this, we used electron microscopy to observe cardiomyocyte  
187 ultrastructure. At E12.5, sarcomeres of *Baf60c<sup>-/-</sup>* hearts were disarrayed, and the thick  
188 and thin filaments were discontinuous and poorly aligned. Z-disks were loosely packed  
189 and did not have clear defined borders as was found in WT sarcomeres. The I band  
190 (thick-filament free zone) and the M bands (myosin head free zone of the thick filaments)  
191 located in the middle of sarcomere were almost undetectable (Fig 5A, top panel).  
192 Similar defects also existed in adult *Baf60c<sup>Myh6KO</sup>* cardiomyocytes. We measured

193 sarcomere length in adult hearts and found the sarcomere length (the length between  
194 two adjacent Z-disks) of *Baf60c*<sup>Myh6KO</sup> mice was significantly shorter than WT (Fig 5B).

195 We examined the distribution of several important structural proteins in cardiomyocytes  
196 by immunofluorescence deconvolution microscopy, and found that the localization of  
197 Desmin in Z-disks of embryonic cardiomyocytes was disturbed in *Baf60c*<sup>-/-</sup> hearts (Fig  
198 5C). In adult *Baf60c*<sup>Myh6KO</sup> hearts, localization of Desmin in intercalated discs was also  
199 reduced (Fig 5D), and the pattern of Desmin localization was perturbed (poorly aligned).  
200 These observations are similar to what was observed by electron microscopy and  
201 together, showing disrupted myofibril alignment and sarcomere structure in the absence  
202 of *Baf60c*.

203

#### 204 **Cardiac gene expression program regulated by Baf60c.**

205 To identify genes regulated by Baf60c, we used RNAseq to analyze total RNA prepared  
206 from *Baf60c*<sup>-/-</sup> hearts and control hearts harvested at E10.5 and E12.5, and from P7  
207 *Baf60c*<sup>Myh6KO</sup> and control hearts. We identified 788 genes that were differentially  
208 expressed by at least 1.25 fold (p<0.05) in at least one stage versus wild type (Fig 6A).  
209 Among all the genes and all the analyzed stages, there were 132 genes upregulated and  
210 175 down-regulated at all time points. Misregulation of major cardiac transcription factors  
211 or signaling molecules was not observed. Instead, consistent with the ultrastructural  
212 findings, many genes related with cardiac metabolism and striated muscle contraction  
213 such *Acta1*, *Aldh1l2*, *Casq1*, *Casq2*, *Ckm*, *Ckmt2*, *Trim72*, *Kbtbd10 (Krp1)*, *Myh7b*, *Myl3*,  
214 *Mylpf*, *Obscn*, and *Tnni2* were identified as downregulated in embryonic and adult  
215 *Baf60c*-deficient hearts (Fig 6B). A broader range of cardiac function related genes was  
216 deregulated in the *Baf60c*<sup>Myh6KO</sup> hearts, including *Gja3*, *Myl1*, *Myl4*, *Myl7*, and *Tnni1*. The  
217 postnatal deletion of *Baf60c* also resulted in induction of *Nppa*, as might be expected in  
218 a cardiomyopathic heart (Houweling et al., 2005), but the induction was mild (only 2-fold  
219 increase), indicating a potential deficiency in upregulation of this marker of cardiac stress.  
220 In fact, the usual set of cardiac stress-responsive genes was not present in the  
221 *Baf60c*<sup>Myh6KO</sup> cardiac gene expression program. Gene ontology (GO) analysis of genes  
222 repressed by *Baf60c* in postnatal heart enriched for biological processes involved in  
223 broad developmental processes and extracellular structure organization (Fig 6C). On the  
224 other hand, *Baf60c* activated genes were enriched for muscle system processes,  
225 regulation of muscle cell differentiation, muscle contraction, and sarcomere and actin

226 cytoskeleton organization (Fig 6D). An enrichment of cell cycle-related genes was also  
227 apparent; it is not clear what this signifies, and may reflect a role for *Baf60c* in regulating  
228 perinatal proliferation, which was not addressed in this study. These results collectively  
229 suggest that *Baf60c* is required for proper expression of genes encoding components or  
230 regulators of the contractile apparatus.

231 The analysis of gene expression in whole hearts has the disadvantage that a  
232 heterogeneous mix of cells may prevent the clear identification of the full set of *Baf60c*-  
233 regulated genes, and also that some changes in gene expression may be secondary to  
234 altered hemodynamics. We compared the set of genes altered in the *Baf60c* mutant  
235 hearts with RNAseq analysis of cardiac precursors and cardiomyocytes differentiated in  
236 vitro from WT and *Baf60c*<sup>-/-</sup> embryonic stem (ES) cells (Hota et al., 2017). Considerable  
237 overlap was found for the E12.5 KO hearts and ES cell-derived cardiac precursors  
238 differentially expressed genes, and more significant overlap was found for E12.5 KO and  
239 *Baf60c*<sup>Myh6KO</sup> hearts with ES cell-derived cardiomyocyte (Fig.6E). These comparisons  
240 show that both in vitro and in vivo, *Baf60c* regulates a set of genes important for cardiac  
241 morphogenesis and function.

#### 242 **Baf60c functionally interacts with Myocardin**

243 We previously identified TBX5 and NKX2-5 as potential BAF60c-interacting proteins  
244 (Lickert et al., 2004). Here we demonstrate by GST pulldown that these interactions can  
245 be direct (Fig 7A). We mapped the BAF60c interaction domain to an N-terminal region  
246 (aa residues xx-xx) that contains a nuclear localization signal sequence (Fig 7B). To  
247 further elucidate the molecular mechanism of BAF60c function, we searched for  
248 potential association partners of BAF60c. In a yeast 2 hybrid screen of a human heart  
249 cDNA library, using BAF60c as the bait, we identified few potential interacting factors  
250 (BAF155, FEZ1, MYOCD). BAF155 is a component of the BAF complex, which indicates  
251 a direct interaction between these two BAF complex subunits. Of particular interest  
252 amongst candidate interactors was Myocardin (MYOCD), a transcriptional co-factor of  
253 SRF and MEF2c (Creemers et al., 2006; Wang et al., 2001). GST pull-down assay  
254 between GST-fused BAF60c and in-vitro synthesized MYOCD confirmed the direct  
255 association, and mapped the association domain of MYOCD with BAF60c to amino  
256 acids 328-554 (Fig 7C). *Myf1* is a bona fide direct target of MEF2c/Myocardin (Creemers  
257 et al., 2006) and was downregulated in the absence of *Baf60c*. In an in vitro promoter



258 activation assay, BAF60c could potentially enhance the activation of the *Myf1* promoter by  
259 MYOCD and MEF2c (Fig 7D). Together our data suggest that BAF60c can function as a  
260 partner of MYOCD in cardiac development, and that this interaction may be important for  
261 the activation of a gene expression program essential for the fundamental functional  
262 properties of cardiomyocytes.

263

264

## 265 **Discussion**

266 We have demonstrated the requirement for *Baf60c* in cardiomyocyte function throughout  
267 heart development. Loss of *Baf60c* both prenatally and postnatally resulted in cardiac  
268 hypoplasia and defective heart function. *Baf60c* regulates programs of gene expression  
269 that are essential for primary functions of cardiomyocytes, including broad sets of genes  
270 essential for sarcomere function and cardiac metabolism.

271 The *Baf60c* constitutive knockout phenotype is milder than the mouse shRNA  
272 knockdown phenotypes published previously (Lickert et al., 2004). The shRNA  
273 knockdowns were performed using two different shRNAs, minimizing the possibility of  
274 off-target effects, and the phenotype was rescued by over-expression of BAF60b,  
275 indicating significant specificity of the shRNAs. A similar discrepancy exists for *Ifitm*  
276 genes, for which the shRNA phenotype is more severe than that of a genetic deletion  
277 (Lange et al., 2008; Tanaka et al., 2005). The possible reasons for the different  
278 phenotypes between the shRNA and the genetic null might include effects compounding  
279 the loss of *Baf60c* function such as overloading of the microRNA processing machinery  
280 by overexpressing shRNAs at high levels, other non-specific effects inherent to  
281 overexpression of shRNAs in the mouse embryo, or failure to compensate for immediate  
282 repression of gene function by RNAi. The genetic deletion presented here confirms an  
283 important role for *Baf60c* in heart development, and extends these findings significantly.

284 The phenotype resulting from loss of *Baf60c* suggests that *Baf60c* has a specific role in  
285 regulating gene expression programs necessary for cardiac growth and contractile  
286 function. BRG1, the core ATPase of BAF complexes, has broad and critical roles in  
287 supporting cardiomyocyte proliferation and differentiation at embryonic stages and  
288 hypertrophic growth in the stressed adult heart (Hang et al., 2010; Takeuchi et al., 2011).

289 Our data suggest that a BAF60c-containing cardiac-specific BAF complex has a more  
290 specialized role, and may have evolved to provide fine-tuned and specific gene  
291 regulation in the mammalian heart. Indeed, we have isolated BAF complexes during in  
292 vitro cardiac differentiation and have identified that BAF60c-containing complexes in  
293 cardiomyocytes have a composition that differs from many BRG1-containing complexes  
294 (Hota et al., 2017). In skeletal muscle differentiation, BAF60c interacts with MYOD to  
295 activate muscle-specific genes (Forcales et al., 2012), and is essential for HDAC-  
296 dependent fibro-adipogenic precursor differentiation in dystrophic muscle (Saccone et al.,  
297 2014). The set of genes that are altered due to depletion of BAF60c in differentiating  
298 C2C12 cells (Forcales et al., 2012) is remarkably similar to those altered by loss of  
299 BAF60c in the heart, indicating a commonality in the regulatory program controlled by  
300 BAF60c in cardiac and skeletal muscle. The role of BAF60c in glycolytic metabolism of  
301 fast-twitching muscle has also been described (Meng et al., 2013); whether Baf60c has  
302 a specific function regulating metabolic switching during cardiomyocyte maturation will  
303 be a potential direction for future studies.

304 *Myocd* is an essential factor for embryonic cardiac gene expression and postnatal  
305 myocardial function (Creemers et al., 2006) (Huang et al., 2012; Huang et al., 2009).  
306 Loss of *Myocd* in cardiac precursors results in a phenotype very similar to that of  
307 *Baf60c*-null embryos, with death around E13.5, thinned myocardium, ventricular septal  
308 defects, and reduced proliferation (Huang et al., 2012). Cardiomyocyte-specific deletion  
309 of *Myocd*, as with that of *Baf60c*, also results in sarcomere disorganization,  
310 mislocalization of Desmin, and apoptosis (Huang et al., 2009). However, the changes in  
311 gene expression documented in *Myocd* deficient hearts are not fully recapitulated by the  
312 loss of *Baf60c*, indicating that a MYOCD/BAF60c interaction may target a specific subset  
313 of *Myocd*-regulated genes, such as *Myf1* and others. The association domain of MYOCD  
314 with BAF60c did not differentiate between the smooth muscle and cardiac isoforms  
315 (Creemers et al., 2006), suggesting BAF60c can either associate with both and regulate  
316 different programs, or there are other mechanisms *in vivo* controlling selective  
317 association with either isoform. BAF60c can act on SRF-dependent promoters to  
318 regulate smooth muscle gene expression (Sohni et al., 2012); it remains to be  
319 determined whether this activity also involves an interaction with Myocardin.

320 Mutations in many cardiac transcription factor and structural genes have been identified  
321 to result in congenital heart defects and cardiomyopathy (Ahmad et al., 2005; Bruneau,

322 2008; Fahed et al., 2013). Mutations in histone modifying complex subunit genes and in  
323 some chromatin remodeling protein-encoding genes have been identified in patients with  
324 CHDs (Homsy et al., 2015; Zaidi et al., 2013). While no mutations in *SMARCD3*, which  
325 encodes BAF60c, have been associated with CHDs, the functional interaction of BAF60c  
326 with several transcription factors implicated in CHDs suggests that a potential underlying  
327 mechanism for CHDs may be dependent on BAF60c. Indeed, our recent proteomic  
328 analysis of BAF complexes has identified WDR5, mutated in human CHD, as part of a  
329 cardiac-enriched BAF complex (Hota et al., 2017). In conclusion, we have demonstrated  
330 the essential role of BAF60c in cardiac growth and function, and implied a possibility of  
331 chromatin remodeling factors contributing to CHDs.

332

### 333 **Methods**

#### 334 **ES cell targeting and mouse line establishment**

335 A *Baf60c* genomic DNA fragment with loxP sites flanking 1<sup>st</sup> exon to 4<sup>th</sup> exon and Frt-  
336 Neo-Frt cassettes downstream of 4<sup>th</sup> exon was constructed using bacterial  
337 recombineering (Fig. 1A). For gene targeting, 5x10<sup>6</sup> R1 ES cells were trypsinized and  
338 electroporated with 25ug linearized targeting DNA. The electroporated cells were  
339 selected with 160ug/ml G418 (Gibco # 10131) for 7 days. Correctly targeted clones were  
340 identified using Southern Blot with DNA probes located outside the targeting DNA and  
341 labeled with <sup>32</sup>P (Perkin Elmer). The clones were then expanded and used for diploid  
342 aggregation. High ESC contributed chimera males were bred with ICR and C57/BL6 for  
343 germline transmission. *Baf60C<sup>neo/+</sup>* progeny were mated with FLPe-expressing mice  
344 (B6;SJL-Tg(ACTFLPe)9205Dym/J, maintained at the Toronto Center for  
345 Phenogenomics, TCP) to remove the *Neo* cassette between the *frt* sites and yield  
346 *Baf60c<sup>fllox/+</sup>* mice. To generate the *Baf60c* deletion, *Baf60c<sup>fllox/+</sup>* mice were mated with  
347 pCX-NLS-Cre mice (maintained at the TCP).

#### 348 **Mouse and embryo genotyping**

349 The *Baf60c<sup>fllox/+</sup>* and *Baf60c<sup>+/-</sup>* mice were genotyped by PCR using 3 primers: WTfor (5'-  
350 CGTTCTGCAAGATGGTCTGA-3'), DELfor (5'-AGGCAGACCCAAGCTTGATA-3') and  
351 Rev (5'-CATCAGAGTCTTCCGCATCA-3'). *Baf60c* deletion band is 250bp, wild type is  
352 350bp and *Baf60c* floxed is 470bp. Postnatal mouse tissues (tail tips or ear notches)  
353 and embryo tissues (yolk sac, tails, limb buds) were prepared with the tissue preparation  
354 buffer of the Sigma Extract-N-Amp tissue PCR kit (Sigma, XNAT2).

#### 355 **Histology**

356 Mouse embryos or tissues were fixed with 4% PFA, dehydrated and embedded with  
357 paraffin and sectioned into 4 $\mu$ m sections then mounted on glass slides. The slides were  
358 then stained using standard histology protocols.

### 359 **Whole mount In-situ hybridization**

360 Whole mount in-situ hybridization on mouse embryos from E7.5 to E10.5 was performed  
361 according to standard protocols using the *Baf60* in situ hybridization probe (Lickert et al.,  
362 2004).

### 363 **Optical projection tomography**

364 Optical projection tomography (OPT) was performed as described previously (Sharpe et  
365 al., 2002) using a OPT system built in-house. E12.5 embryos were harvested,  
366 genotyped, fixed with 4% PFA overnight and washed with PBS. The specimens were  
367 then embedded in 1% low melting point (LMP) agarose and subsequently cleared using  
368 a 1:2 mixture of benzyl alcohol and benzyl benzoate (BABB). The index-matched  
369 specimen was suspended from a stepper motor and immersed in a BABB bath  
370 encompassed in a glass cuvette. Light from a mercury lamp was directed onto the  
371 specimen and filter sets were used to create fluorescent images of the specimen. An  
372 autofluorescence projection was captured with using a GFP filter set in the illumination  
373 and detection light path. Images of the specimen were formed using a Qioptiq  
374 Telecentric Zoom 100 microscope equipped with a 0.5X OPTEM objective lens.  
375 Projection images were acquired with a Retiga-4000DC CCD camera with pixel size  
376 equal to 7.4 $\mu$ m/pixel. The sample was rotated in finite steps, 0.3 degrees, through a  
377 complete revolution totaling 1200 projections. Image reconstruction into a 3D data set  
378 was then executed by a modified Feldkamp algorithm in supplied software by SkyScan  
379 (Nrecon). The resultant OPT images have an isotropic 8.8 micron pixel size.

### 380 **RNA-seq**

381 Mouse embryos from *Baf60c*<sup>+/-</sup> intercross timed pregnancy at E10.5 and E12.5, or  
382 ventricles from *Myh6::Cre;Baf60c*<sup>fl/+</sup> X *Baf60c*<sup>+/-</sup> intercrosses were harvested. Their  
383 hearts were individually dissected and snap-frozen with liquid nitrogen. RNA was  
384 prepared from each single heart using PicoPure RNA Isolation kit (Arcturus). RNA  
385 quantity and quality was analyzed using Agilent RNA 6000 Nano Kit. RNA-seq was  
386 performed as described (Christodoulou et al., 2011; Christodoulou et al., 2014). RNA  
387 reads were aligned with TopHat / Bowtie and Useq was used for the analysis of  
388 differential expression. RNAs that showed significant differential expression between  
389 wild type and *Baf60c*<sup>-/-</sup> (p-value <0.05) and also changed more than 1.25 fold in *Baf60c*<sup>-/-</sup>

390 over wild type at a specific stage of differentiation were selected for analysis, avoiding  
391 duplicate and redundant entries.

### 392 **Transmission Electron Microscopy**

393 Mouse E10.5, E12.5 embryonic hearts and 8 week old adult hearts were dissected. For  
394 embryonic hearts, the whole heart was used for fixation and section. For adult hearts,  
395 pieces of 3~4 mm in size cut from the left ventricle were used as specimens. Pieces of  
396 specimen were fixed in a fixative containing 4% formaldehyde and 1% glutaraldehyde in  
397 phosphate buffer, pH7.3, and then post fixed in 1% osmium tetroxide. The specimens  
398 were then dehydrated in a graded series of acetone from 50% to 100% and  
399 subsequently infiltrated and embedded in Epon-Araldite epoxy resin. The processing  
400 steps from post fixation to polymerization of resin blocks were carried out in a microwave  
401 oven, Pelco BioWave 34770 (Pelco International, CA) using similar procedures, with  
402 slight modification, as recommended by the manufacturer. Ultrathin sections were cut  
403 with a diamond knife on the Reichert Ultracut E (Leica Inc., Austria). Sections were  
404 stained with uranyl acetate and lead citrate before being examined in the JEM-1011  
405 (JEOL USA Corp., Peabody, MA). Digital electron micrographs were acquired directly  
406 with a 1024 X1024 pixels CCD camera system (AMT Corp., Denver, MA, USA) attached  
407 to the TEM.

### 408 **Echocardiography assessment of cardiac functions**

409 E13.5 embryos were analyzed with a Vevo770 ultrasound machine (VisualSonics).  
410 Pregnant *Baf60c*<sup>+/-</sup> female mice carrying the embryos at the required developmental  
411 stages were examined under isoflurane anaesthesia. The uterus were exposed from the  
412 incision and scanned with a 30 MHz transducer as described (Lickert et al., 2004). To  
413 minimize potential impairment of embryonic physiology, only 2 or 3 embryos were  
414 scanned for each female, taking about 1 hour. The mother's heart rate was monitored  
415 throughout the scanning. For each embryo, the blood flow speed near the mitral and  
416 tricuspid valves and aorta was recorded at B-mode. The depth of ventricle walls and  
417 ventricle septation was measured at M-mode. After scanning, the embryos were  
418 harvested and genotyped. 4-5 embryos of each genotype were measured. Adult mice  
419 were analyzed using a Vevo2100 ultrasound machine (VisualSonics). The 7-8 week old  
420 animals were anaesthetized and scanned with a 30 MHz transducer as described (Zhou  
421 et al., 2005). E and A peaks in the left ventricle were measured at B-mode. The  
422 chamber dimensions and ventricle wall depths as well as ventricle septation depth were  
423 measured at M-mode. For each genotype, 5-6 mice were measured.

#### 424 **Electrocardiography**

425 Mice were anesthetized with 1-2% isoflurane and lead II ECG was recorded from needle  
426 electrodes inserted subcutaneously into the right forelimb and into each hindlimb. The  
427 signal was recorded for ~1 minute. The ECG was recorded with Power Lab/4SP (AD  
428 Instruments) and analyzed using the SAECG (signal-averaged electrocardiogram)  
429 extension for Chart 4 (v4.2.3 for Macintosh, AD Instruments).

#### 430 **Immunofluorescence Microscopy**

431 Sarcomeric architecture and organization were assessed in E12.5 and adult hearts via  
432 double immunofluorescence staining. Heart tissue was embedded in Tissue-Tek  
433 Optimum Cutting Temperature (OCT) compound (Sakura Finetek) and immediately  
434 frozen in 2-methylbutane precooled in liquid nitrogen. 5mm cryosections were mounted  
435 on gelatin coated 1.5 glass coverslips. Tissue sections were fixed in 4%  
436 paraformaldehyde, permeabilized with 0.2% Triton-X 100/PBS and blocked with 2%  
437 BSA/1% normal donkey serum/PBS prior to incubation with antibodies. The primary  
438 antibodies included: rabbit polyclonal anti-desmin (1:30) (ImmunoBioscience RP-4023-  
439 04), mouse monoclonal anti-sarcomeric  $\alpha$ -actinin (1:1000) (Clone EA-53; Sigma A7811),  
440 and mouse monoclonal anti-desmoplakin 1/2 (1:1000) (Clone DP-2.15; AbDSerotec  
441 2722-5204) antibodies. The secondary antibodies, obtained from Jackson  
442 Immunoresearch Laboratories, included: Alexa Fluor 488 goat anti-mouse IgG (1:500),  
443 Alexa Fluor 488 goat anti-rabbit IgG (1:500), Texas Red goat anti-mouse IgG (1:500),  
444 and Texas Red goat anti-rabbit IgG (1:500). Coverslips were mounted onto slides with  
445 Aqua Poly/Mount (Polysciences Inc.). All sections were analyzed on a Deltavision RT  
446 system with 100x (1.3 NA) objective and a CoolSnap HQ charge-coupled device camera  
447 (Photometrics) using softWoRx 3.5.1 software. Images were prepared for presentation  
448 using Photoshop CS (Adobe Systems).

#### 449 **TUNEL analysis**

450 Cell death on sections was detected using Roche In Situ cell death detection kit  
451 Fluorescein (11684795910).

#### 452 **Yeast two-hybrid assay**

453 A full-length BAF60c expression construct was used as a bait in a yeast two-hybrid  
454 assay conducted by Hybrigenics (<http://www.hybrigenics-services.com/>), using a human  
455 fetal/adult heart library.

#### 456 **Luciferase Assay**

457 The *MyI1* luciferase construct has been described (Creemers et al., 2006). Combined  
458 DNA vectors were transfected into early exponential stage 10T1/2 cells cultured in 6-well  
459 dishes with Fugene 6 (Roche, 1181443001) following the product manual. After  
460 culturing for another 40-48 hrs, the cells were lysed and luciferase activity analyzed with  
461 Dual-Luciferase Reporter Assay System (Promega E1910). The luciferase activity was  
462 normalized with renilla activity. Three biological replicates were prepared for each  
463 combination.

#### 464 **GST-pulldown assay**

465 <sup>35</sup>S labeled proteins (TBX5, NKX2-5, RBPjk, NICD, BAF60c serial deletions, Myocardin  
466 serial deletions (Wang et al., 2001)) were synthesized with the TnT SP6 coupled  
467 reticulocyte lysate system (Promega, L4600) or TnT T7 coupled reticulocyte lysate  
468 system (Promega L4610) and labeled with <sup>35</sup>S Methionine (Perkin Elmer NEG709A). 5  
469 µl of each synthesized protein was analyzed with SDS-PAGE gel and exposed to X-ray  
470 film for evaluation. GST-BAF60c, GST-RBPjk, GST-TBX5 and GST were expressed in  
471 *E.Coli* strain BL21 and purified with Glutathione Sepharose 4B (GE Healthcare, 17-  
472 0756-01). The Glutathione sepharose 4B beads were incubated with <sup>35</sup>S labeled target  
473 proteins overnight at 4°C and washed with PBST for 3 times. The beads were then  
474 boiled in loading buffer. The protein was analyzed with SDS-PAGE gel followed by  
475 autoradiography

#### 476 **Statistics**

477 Data were expressed as mean±SEM. Differences among multiple experimental groups  
478 were evaluated by ANOVA followed by post-hoc Fisher's LSD test. Pairwise  
479 comparisons were evaluated by student's *t*-tests. *p* values < 0.05 were considered as  
480 significant.

481

482

483 **Acknowledgements:** We thank the Toronto Center for Phenogenomics for chimera  
484 production, A. Williams and S. Thomas (Gladstone Bioinformatics Core) for data  
485 analysis, L. Ta (Gladstone Genomics Core) and J. Gorham (Harvard Medical School) for  
486 RNAseq library preparation, Yew Meng and Aina Tilups (Sickkids Pathlogy Dept) for  
487 electron microscopy, J.N. Wylie for luciferase assay, and G. Howard for editing.

488

489 **Competing Interests:** B.G.B is a co-founder of Tenaya Therapeutics

490

491 **Funding Information:** This work was supported by grants from the National Institutes of  
492 Health (R01HL085860, P01HL089707, Bench to Bassinet Program UM1HL098179,  
493 B.G.B; R01HL108625, C.C.G.), the California Institutes of Regenerative Medicine (RN2-  
494 00903, B.G.B.), and the Lawrence J. and Florence A. DeGeorge Charitable  
495 Trust/American Heart Association Established Investigator Award (B.G.B); and  
496 postdoctoral fellowships from the American Heart Association (13POST17290043) and  
497 Tobacco Related Disease Research Program (22FT-0079) to S.K.H. This work was also  
498 supported by an NIH/NCRR grant (C06 RR018928) to the J. David Gladstone Institutes  
499 and by the Younger Family Fund (B.G.B.).

500

## 501 **References**

502

- 503 **Agah, R., Frenkel, P. A., French, B. A., Michael, L. H., Overbeek, P. A. and**  
504 **Schneider, M. D.** (1997). Gene recombination in postmitotic cells. Targeted  
505 expression of Cre recombinase provokes cardiac-restricted, site-specific  
506 rearrangement in adult ventricular muscle in vivo. *J Clin Invest* **100**, 169-179.
- 507 **Ahmad, F., Seidman, J. G. and Seidman, C. E.** (2005). The genetic basis for cardiac  
508 remodeling. *Annu Rev Genomics Hum Genet* **6**, 185-216.
- 509 **Anand, P., Brown, J. D., Lin, C. Y., Qi, J., Zhang, R., Artero, P. C., Alaiti, M. A.,**  
510 **Bullard, J., Alazem, K., Margulies, K. B., et al.** (2013). BET bromodomains  
511 mediate transcriptional pause release in heart failure. *Cell* **154**, 569-582.
- 512 **Bruneau, B. G.** (2008). The developmental genetics of congenital heart disease. *Nature*  
513 **451**, 943-948.
- 514 ---- (2013). Signaling and transcriptional networks in heart development and  
515 regeneration. *Cold Spring Harbor perspectives in biology* **5**, a008292.
- 516 **Chang, C. P. and Bruneau, B. G.** (2012). Epigenetics and Cardiovascular Development.  
517 *Annu Rev Physiol* **74**, 13.11–13.28.
- 518 **Christodoulou, D. C., Gorham, J. M., Herman, D. S. and Seidman, J. G.** (2011).  
519 Construction of normalized RNA-seq libraries for next-generation sequencing  
520 using the crab duplex-specific nuclease. *Curr Protoc Mol Biol* **Chapter 4**, Unit4  
521 12.
- 522 **Christodoulou, D. C., Wakimoto, H., Onoue, K., Eminaga, S., Gorham, J. M.,**  
523 **DePalma, S. R., Herman, D. S., Teekakirikul, P., Conner, D. A., McKean, D.**  
524 **M., et al.** (2014). 5'RNA-Seq identifies Fhl1 as a genetic modifier in  
525 cardiomyopathy. *J Clin Invest* **124**, 1364-1370.
- 526 **Creemers, E. E., Sutherland, L. B., Oh, J., Barbosa, A. C. and Olson, E. N.** (2006).  
527 Coactivation of MEF2 by the SAP domain proteins myocardin and MASTR. *Mol*  
528 *Cell* **23**, 83-96.
- 529 **Devine, W. P., Wythe, J. D., George, M., Koshiba-Takeuchi, K. and Bruneau, B. G.**  
530 (2014). Early patterning and specification of cardiac progenitors in gastrulating  
531 mesoderm. *eLife* **3**.
- 532 **Evans, S. M., Yelon, D., Conlon, F. L. and Kirby, M. L.** (2010). Myocardial lineage  
533 development. *Circulation research* **107**, 1428-1444.
- 534 **Fahed, A. C., Gelb, B. D., Seidman, J. G. and Seidman, C. E.** (2013). Genetics of  
535 congenital heart disease: the glass half empty. *Circulation research* **112**, 707-720.



- 536 **Forcales, S. V., Albin, S., Giordani, L., Malecova, B., Cignolo, L., Chernov, A.,**  
537 **Coutinho, P., Saccone, V., Consalvi, S., Williams, R., et al. (2012).** Signal-  
538 dependent incorporation of MyoD-BAF60c into Brg1-based SWI/SNF chromatin-  
539 remodelling complex. *The EMBO journal* **31**, 301-316.
- 540 **Hang, C. T., Yang, J., Han, P., Cheng, H. L., Shang, C., Ashley, E., Zhou, B. and**  
541 **Chang, C. P. (2010).** Chromatin regulation by Brg1 underlies heart muscle  
542 development and disease. *Nature* **466**, 62-67.
- 543 **Ho, L. and Crabtree, G. R. (2010).** Chromatin remodelling during development. *Nature*  
544 **463**, 474-484.
- 545 **Homsy, J., Zaidi, S., Shen, Y., Ware, J. S., Samocha, K. E., Karczewski, K. J.,**  
546 **DePalma, S. R., McKean, D., Wakimoto, H., Gorham, J., et al. (2015).** De novo  
547 mutations in congenital heart disease with neurodevelopmental and other  
548 congenital anomalies. *Science* **350**, 1262-1266.
- 549 **Hota, S. K. and Bruneau, B. G. (2016).** ATP-dependent chromatin remodeling during  
550 mammalian development. *Development* **143**, 2882-2897.
- 551 **Hota, S. K., Johnson, J. R., Verschueren, E., Zhu, Y., Sun, X., Pennacchio, L. A.,**  
552 **Rossant, J., Krogan, N. J. and Bruneau, B. G. (2017).** BRG1/BRM-associated  
553 factor complex subunit diversity promotes temporally distinct gene expression  
554 programs in cardiogenesis. *bioRxiv*.
- 555 **Houweling, A. C., van Borren, M. M., Moorman, A. F. and Christoffels, V. M. (2005).**  
556 Expression and regulation of the atrial natriuretic factor encoding gene *Nppa*  
557 during development and disease. *Cardiovasc Res* **67**, 583-593.
- 558 **Huang, J., Elicker, J., Bowens, N., Liu, X., Cheng, L., Cappola, T. P., Zhu, X. and**  
559 **Parmacek, M. S. (2012).** Myocardin regulates BMP10 expression and is required  
560 for heart development. *J Clin Invest* **122**, 3678-3691.
- 561 **Huang, J., Min Lu, M., Cheng, L., Yuan, L. J., Zhu, X., Stout, A. L., Chen, M., Li, J.**  
562 **and Parmacek, M. S. (2009).** Myocardin is required for cardiomyocyte survival  
563 and maintenance of heart function. *Proceedings of the National Academy of*  
564 *Sciences of the United States of America* **106**, 18734-18739.
- 565 **Lange, U. C., Adams, D. J., Lee, C., Barton, S., Schneider, R., Bradley, A. and**  
566 **Surani, M. A. (2008).** Normal germ line establishment in mice carrying a deletion  
567 of the *lftm/Fragilis* gene family cluster. *Molecular and cellular biology* **28**, 4688-  
568 4696.
- 569 **Lickert, H., Takeuchi, J. K., von Both, I., Walls, J. R., McAuliffe, F., Adamson, S. L.,**  
570 **Henkelman, R. M., Wrana, J. L., Rossant, J. and Bruneau, B. G. (2004).**  
571 Baf60c is essential for function of BAF chromatin remodelling complexes in heart  
572 development. *Nature* **432**, 107-112.
- 573 **Lou, X., Deshwar, A., Crump, J. G. and Scott, I. C. (2011).** Smarcd3b and Gata5  
574 promote a cardiac progenitor fate in the zebrafish embryo. *Development* **138**.
- 575 **McKinsey, T. A. (2012).** Therapeutic potential for HDAC inhibitors in the heart. *Annu*  
576 *Rev Pharmacol Toxicol* **52**, 303-319.
- 577 **Meng, Z. X., Li, S., Wang, L., Ko, H. J., Lee, Y., Jung, D. Y., Okutsu, M., Yan, Z., Kim,**  
578 **J. K. and Lin, J. D. (2013).** Baf60c drives glycolytic metabolism in the muscle  
579 and improves systemic glucose homeostasis through Deptor-mediated Akt  
580 activation. *Nat Med* **19**, 640-645.
- 581 **Moses, K. A., DeMayo, F., Braun, R. M., Reecy, J. L. and Schwartz, R. J. (2001).**  
582 Embryonic expression of an *Nkx2-5/Cre* gene using ROSA26 reporter mice.  
583 *Genesis* **31**, 176-180.
- 584 **Niu, Z., Iyer, D., Conway, S. J., Martin, J. F., Ivey, K., Srivastava, D., Nordheim, A.**  
585 **and Schwartz, R. J. (2008).** Serum response factor orchestrates nascent

- 586 sarcomerogenesis and silences the biomineralization gene program in the heart.  
587 *Proc Natl Acad Sci U S A* **105**, 17824-17829.
- 588 **Oka, T., Maillet, M., Watt, A. J., Schwartz, R. J., Aronow, B. J., Duncan, S. A. and**  
589 **Molkentin, J. D.** (2006). Cardiac-specific deletion of Gata4 reveals its  
590 requirement for hypertrophy, compensation, and myocyte viability. *Circ Res* **98**,  
591 837-845.
- 592 **Saccone, V., Consalvi, S., Giordani, L., Mozzetta, C., Barozzi, I., Sandona, M., Ryan,**  
593 **T., Rojas-Munoz, A., Madaro, L., Fasanaro, P., et al.** (2014). HDAC-regulated  
594 myomiRs control BAF60 variant exchange and direct the functional phenotype of  
595 fibro-adipogenic progenitors in dystrophic muscles. *Genes Dev* **28**, 841-857.
- 596 **Sharpe, J., Ahlgren, U., Perry, P., Hill, B., Ross, A., Hecksher-Sorensen, J.,**  
597 **Baldock, R. and Davidson, D.** (2002). Optical projection tomography as a tool  
598 for 3D microscopy and gene expression studies. *Science* **296**, 541-545.
- 599 **Sohni, A., Mulas, F., Ferrazzi, F., Luttun, A., Bellazzi, R., Huylebroeck, D., Ekker, S.**  
600 **C. and Verfaillie, C. M.** (2012). TGFbeta1-induced Baf60c regulates both  
601 smooth muscle cell commitment and quiescence. *PLoS ONE* **7**, e47629.
- 602 **Takeuchi, J. K. and Bruneau, B. G.** (2009). Directed transdifferentiation of mouse  
603 mesoderm to heart tissue by defined factors. *Nature* **459**, 708-711.
- 604 **Takeuchi, J. K., Lou, X., Alexander, J. M., Sugizaki, H., Delgado-Olguin, P.,**  
605 **Holloway, A. K., Mori, A. D., Wylie, J. N., Munson, C., Zhu, Y., et al.** (2011).  
606 Chromatin remodelling complex dosage modulates transcription factor function in  
607 heart development. *Nat Commun* **2**, 187.
- 608 **Tanaka, S. S., Yamaguchi, Y. L., Tsoi, B., Lickert, H. and Tam, P. P.** (2005).  
609 IFITM/Mil/fragilis family proteins IFITM1 and IFITM3 play distinct roles in mouse  
610 primordial germ cell homing and repulsion. *Developmental cell* **9**, 745-756.
- 611 **Wang, D., Chang, P. S., Wang, Z., Sutherland, L., Richardson, J. A., Small, E., Krieg,**  
612 **P. A. and Olson, E. N.** (2001). Activation of cardiac gene expression by  
613 myocardin, a transcriptional cofactor for serum response factor. *Cell* **105**, 851-  
614 862.
- 615 **Zaidi, S., Choi, M., Wakimoto, H., Ma, L., Jiang, J., Overton, J. D., Romano-**  
616 **Adesman, A., Bjornson, R. D., Breitbart, R. E., Brown, K. K., et al.** (2013). De  
617 novo mutations in histone-modifying genes in congenital heart disease. *Nature*  
618 **498**, 220-223.
- 619 **Zhou, Y. Q., Foster, F. S., Parkes, R. and Adamson, S. L.** (2003). Developmental  
620 changes in left and right ventricular diastolic filling patterns in mice. *Am J Physiol*  
621 *Heart Circ Physiol* **285**, H1563-1575.
- 622 **Zhou, Y. Q., Foster, F. S., Qu, D. W., Zhang, M., Harasiewicz, K. A. and Adamson, S.**  
623 **L.** (2002). Applications for multifrequency ultrasound biomicroscopy in mice from  
624 implantation to adulthood. *Physiological genomics* **10**, 113-126.
- 625 **Zhou, Y. Q., Zhu, Y., Bishop, J., Davidson, L., Henkelman, R. M., Bruneau, B. G.**  
626 **and Foster, F. S.** (2005). Abnormal cardiac inflow patterns during postnatal  
627 development in a mouse model of Holt-Oram syndrome. *Am J Physiol Heart Circ*  
628 *Physiol* **289**, H992-H1001.
- 629
- 630
- 631
- 632
- 633

634

635 **Table 1. High frequency echocardiography evaluation of E13.5 embryos**

|                           | <b>WT (n=4)</b> | <b><i>Baf60c</i><sup>+/-</sup><br/>(n=5)</b> | <b><i>Baf60c</i><sup>-/-</sup><br/>(n=5)</b> | <b>P-value</b>                                            |
|---------------------------|-----------------|----------------------------------------------|----------------------------------------------|-----------------------------------------------------------|
| <b>LV ESD (mm)</b>        | 0.67±0.03       | 0.72±0.02                                    | 0.79±0.02                                    | <i>P</i> =0.0087                                          |
| <b>LV EDD (mm)</b>        | 0.94±0.04       | 0.99±0.03                                    | 1.03±0.03                                    | NS                                                        |
| <b>LV FS (%)</b>          | 28±2            | 27±1                                         | 23±0.02                                      | <i>P</i> =0.02 (WT vs KO)<br><i>P</i> =0.01 (Het vs KO)   |
| <b>RV ESD (mm)</b>        | 0.64±0.03       | 0.6±0.04                                     | 0.69±0.03                                    | NS                                                        |
| <b>RV EDD (mm)</b>        | 0.85±0.02       | 0.89±0.03                                    | 0.92±0.02                                    | NS                                                        |
| <b>RV FS (%)</b>          | 25±3            | 32±2                                         | 24±3                                         | NS                                                        |
| <b>IVSTes (mm)</b>        | 0.32±0.02       | 0.36±0.03                                    | 0.25±0.03                                    | <i>P</i> =0.0023                                          |
| <b>IVSTed (mm)</b>        | 0.22±0.03       | 0.25±0.03                                    | 0.20±0.02                                    | NS                                                        |
| <b>IVSFT</b>              | 40±4            | 41±4                                         | 26±6                                         | <i>P</i> =0.004 (WT vs KO)<br><i>P</i> =0.006 (Het vs KO) |
| <b>Mitral peak E/A</b>    | 0.12±0.04       | 0.25±0.05                                    | 0.32±0.04                                    | <i>P</i> =0.02                                            |
| <b>Tricuspid peak E/A</b> | 0.19±0.03       | 0.17±0.03                                    | 0.34±0.04                                    | <i>P</i> =0.008                                           |

636

637 IVSFT: inter-ventricular septal fractional thickening; IVSTed: end-diastolic inter-  
638 ventricular septum thickness; IVSTes: end-systolic inter-ventricular septum thickness;  
639 IVFST: ; LV EDD: left ventricular end-diastolic diameter; ESD: LV ESD: left ventricular  
640 end-systolic diameter; LV FS: left ventricular fractional shortening; RV EDD: right  
641 ventricular end-diastolic diameter; ESD: RV ESD: right ventricular end-systolic diameter;  
642 RV FS: right ventricular fractional shortening. Peak E/A: the ratio of peak velocities of the  
643 early diastolic waveform (E wave) to the late diastolic waveform during atrial contraction  
644 (A wave) at either mitral or tricuspid orifices.

645

646

647 **Table 2. Echocardiography analysis of the cardiac contractile function**

648 ***Baf60c*<sup>Myh6KO</sup> mice at 8 weeks of age.**

649

650

651

| <b>N=6</b>                  | <b><i>Baf60c</i><sup>fl/+</sup></b> | <b><i>Baf60c</i><sup>fl/+</sup>;<br/><i>Myh6::Cre</i></b> | <b><i>Baf60c</i><sup>fl/-</sup></b> | <b><i>Baf60c</i><sup>fl/-</sup>;<br/><i>Myh6::Cre</i></b> | <b>P-value</b>   |
|-----------------------------|-------------------------------------|-----------------------------------------------------------|-------------------------------------|-----------------------------------------------------------|------------------|
| <b>AWed (mm)*</b>           | 0.93±0.03                           | 0.88±0.03                                                 | 0.80±0.05                           | 0.70±0.04*                                                | <i>P</i> =0.0027 |
| <b>AWes (mm)*</b>           | 1.27±0.05                           | 1.19±0.05                                                 | 1.18±0.08                           | 0.96±0.05*                                                | <i>P</i> =0.0082 |
| <b>PWed (mm)*</b>           | 0.84±0.04                           | 0.73±0.04                                                 | 0.76±0.03                           | 0.66±0.04*                                                | <i>P</i> =0.013  |
| <b>PWes (mm)*</b>           | 1.10±0.04                           | 1.02±0.07                                                 | 1.07±0.03                           | 0.90±0.06*                                                | <i>P</i> =0.046  |
| <b>EDD (mm)*</b>            | 4.18±0.09                           | 4.19±0.02                                                 | 4.34±0.08                           | 5.01±0.18*                                                | <i>P</i> <0.001  |
| <b>ESD (mm)*</b>            | 3.06±0.13                           | 3.09±0.09                                                 | 2.99±0.04                           | 3.85±0.25*                                                | <i>P</i> =0.0021 |
| <b>FS (%)</b>               | 26±2                                | 31±1                                                      | 26±2                                | 23±2*                                                     | <i>P</i> <0.05   |
| <b>Aortic diameter (mm)</b> | 1.17±0.02                           | 1.15±0.02                                                 | 1.14±0.03                           | 1.11±0.01                                                 | NS               |
| <b>Aortic TVI (mm)*</b>     | 35.4±1.9                            | 38.8±2.2                                                  | 37.4±1.1                            | 43.1±1.8*                                                 | <i>P</i> =0.043  |
| <b>CO (ml/min)*</b>         | 14.8±0.6                            | 15.0±0.9                                                  | 12.6±0.7                            | 12.4±0.6*                                                 | <i>P</i> =0.032  |

652

653 AWed: anterior wall thickness at end diastole; AWes: anterior wall thickness at end-

654 systole; EDD: end-diastolic diameter; ESD: end-systolic diameter; FS: fractional

655 shortening; PWed: posterior wall thickness at end-diastole; PWes: posterior wall

656 thickness at end systole; TVI: time-velocity integral; CO: cardiac output. Asterisks

657 indicate significantly different values.

658

659

660 **Table 3. Electrocardiogram analysis of *Baf60c*<sup>Myh6KO</sup> mice**

| <b>N=6</b>                  | <b><i>Baf60c</i><sup>fl/+</sup></b> | <b><i>Baf60c</i><sup>fl/+</sup>; <i>Myh6::Cre</i></b> | <b><i>Baf60c</i><sup>fl/-</sup></b> | <b><i>Baf60c</i><sup>fl/-</sup>; <i>Myh6::Cre</i></b> | <b>P value</b>   |
|-----------------------------|-------------------------------------|-------------------------------------------------------|-------------------------------------|-------------------------------------------------------|------------------|
| <b>Heart rate</b>           | 558±17                              | 560±14                                                | 521±11                              | 453±18*                                               | <i>P</i> =0.036  |
| <b>P duration (ms)</b>      | 10.2±1.0                            | 7.7±0.7                                               | 9.8±0.6                             | 9.2±0.7                                               | NS               |
| <b>PR duration (ms)</b>     | 36.5±0.8                            | 36.5±0.5                                              | 34.7±0.4                            | 30.6±0.5*                                             | <i>P</i> =0.019  |
| <b>QRS duration (ms)</b>    | 7.8±0.2                             | 8.0±0.3                                               | 8.2±0.2                             | 11.0±0.5*                                             | <i>P</i> <0.0001 |
| <b>QT duration (ms)</b>     | 21.3±0.5                            | 20.0±0.5                                              | 20.0±0.6                            | 25.0±0.5*                                             | <i>P</i> =0.031  |
| <b>QT Max Duration (ms)</b> | 8.7±0.7                             | 8.00±0.7                                              | 8.17±0.2                            | 11.0±0.5*                                             | <i>P</i> =0.005  |
| <b>P height (mV)</b>        | 0.15±0.02                           | 0.10±0.03                                             | 0.13±0.03                           | 0.07±0.01*                                            | <i>P</i> =0.015  |
| <b>QRS height (mV)</b>      | 1.1±0.2                             | 1.0±0.2                                               | 1.8±0.2                             | 2.2±0.1*                                              | <i>P</i> <0.001  |

661

662 Asterisks indicate significantly different values.

663

664

665

666 **Figure legends:**

667 **Fig 1.** Construction of *Baf60c* knockout mouse line. A: Schematic representation of  
668 targeting DNA introduced into wild type (WT) *Baf60c* locus. Correctly targeted ES cells  
669 were identified with probe located outside of the homologous arm. Cre-mediated  
670 excision removed exon 1-4 and resulted in *Baf60c*<sup>+/-</sup>. B: Left: Southern blot of digested  
671 ES cell DNA with an external probe outside of the targeting DNA. WT and targeted band  
672 size are as described in A. Right: genotype PCR showing the band size difference of  
673 WT, *Baf60c*<sup>-/-</sup> (KO) and heterozygous *Baf60c*<sup>+/-</sup>. C: Whole-mount in-situ hybridization  
674 using full-length *Baf60c* probe detected no signals in genotyped homozygous *Baf60c*<sup>-/-</sup>  
675 embryos (n>3), indicating complete deletion. E: EcoRI; Tg: targeted; fb: forebrain; ht:  
676 heart; sm: somites.

677

678

679 **Fig 2.** *Baf60c* deletion results in a hypoplastic embryonic heart. A: At E12.5, *Baf60c*<sup>-/-</sup>  
680 embryonic hearts have similar outer dimensions as the WT, but the ventricle chambers  
681 are expanded and ventricle walls are thinner as observed by rendered OPT images.  
682 B&C: Transverse sections and HE staining of E11.5 (B) and few surviving mixed  
683 background E14.5 (C) embryonic hearts. The *Baf60c*<sup>-/-</sup> hearts show incomplete inter-  
684 ventricular septum formation (star), have VSDs (black arrow or arrowhead), thinner  
685 ventricle walls (brackets) and disorganized and reduced trabeculation (blue arrowhead)  
686 compared to WT strains. D: Ki67 staining detects fewer proliferating cardiomyocytes in  
687 E12.5 *Baf60c*<sup>-/-</sup> heart than in WT. Red: CH1 anti tropomyosin; green: Ki67. CL: compact  
688 layer. T: trabeculae.

689

690 **Fig 3.** Deletion of *Baf60c* with *Nkx2-5*<sup>Cre</sup>. HE staining of transverse sections of E14.5  
691 mouse heart shows thinner myocardium, reduced trabeculation, and ventricular  
692 septation defects.

693

694 **Fig 4.** Deletion of *Baf60c* in myocardium results in dilated chambers and impaired  
695 cardiac function. A: *Baf60c*<sup>fl/-</sup>; *Myh6*::*Cre* mice all die before 4 months of age. B: *Baf60c*<sup>fl/-</sup>  
696 ; *Myh6*::*Cre* mice have enlarged hearts and dilated chambers, as shown with whole-  
697 mount (top panel) and 4-chamber view sections (middle panel). Left panel: P10. Right  
698 panel: 8 week hearts. Masson Trichrome staining detects fibrosis in ventricle

699 myocardium (bottom panels, arrowheads). C: *Baf60c*<sup>Myh6KO</sup> myocardium have high level  
700 apoptosis. Green: TUNEL. Blue: DAPI. D: Representative electrocardiogram of adult WT  
701 and *Baf60c*<sup>fl/-</sup>; *Myh6::Cre* mice.

702

703 **Fig.5.** Myofibrillar defects of *Baf60c*<sup>-/-</sup> cardiomyocytes. A: Cardiomyocyte ultrastructure of  
704 WT and *Baf60c*<sup>-/-</sup> under Transmission electron microscopy (TEM). Z: Z-disk. I: I-band;  
705 M: M-line. B: In adult mice, sarcomeres of *Baf60c*<sup>fl/-</sup>; *Myh6::Cre* cardiomyocytes are  
706 shorter. Mouse hearts were not relaxed before sample preparation, but only relaxing  
707 sarcomere were measured. C and D: localization of Desmin was disturbed in embryonic  
708 and adult hearts in the absence of Baf60c.

709

710 **Fig 6:** BAF60c transcriptionally affects cardiac morphogenesis and function. A: Heat  
711 map comparing genes affected by *Baf60c* loss in embryonic hearts (E10.5 and E12.5)  
712 and postnatal ventricles (postnatal Day (P) 7). Significantly affected ( $\geq 1.25$  fold,  $p < 0.05$ )  
713 genes in at least any one stage were selected and clustered. B: Gene ontology (GO)  
714 biological processes enriched in each of these clusters and example genes in that  
715 category are shown. C&D: Genes repressed (C) or activated (D) by Baf60c in P7  
716 ventricles were analyzed for enrichment of GO biological processes and are plotted. The  
717 color of circles represents p-value of enrichment and size represent the size of the GO  
718 term. E: Venn diagram showing genes mis-regulated in absence of Baf60c in embryonic  
719 heart at E10.5, E12.5 and P7 Ventricle and compared cardiac myocyte (Day 10) stages  
720 of in-vitro directed cardiac differentiation.

721

722 **Fig 7:** Interaction between BAF60c and cardiac transcription factors. A. GST-fused  
723 Baf60c associates with <sup>35</sup>S labeled, in-vitro synthesized TBX5 and NKX2-5. B. BAF60c  
724 associates with TBX5 through its N-terminal domain. Left: schemes representing serial  
725 deletion constructs of BAF60c. Right: Mapping the BAF60c associating domain with  
726 GST-fused TBX5. C. BAF60c associates with full length Myocardin and serial deletions.  
727 Left: Schematic representation of myocardin deletion constructs. The region between  
728 Myocardin 328-554 aa was essential for association with Baf60c. D. BAF60c enhances  
729 activation of MYOCD and MEF2c on the *Myf1* luciferase reporter.

730

731

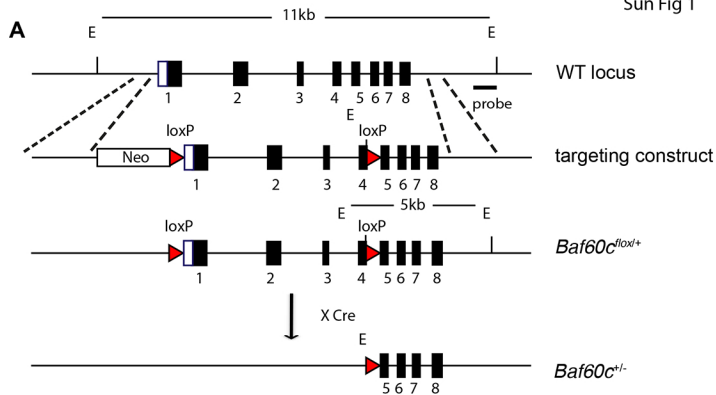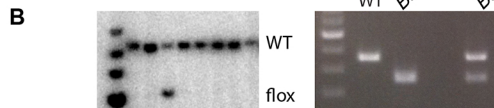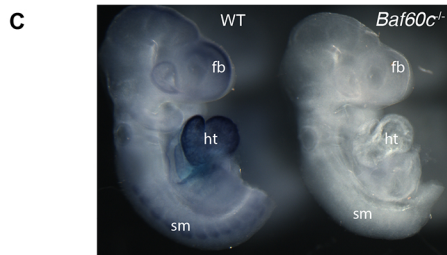



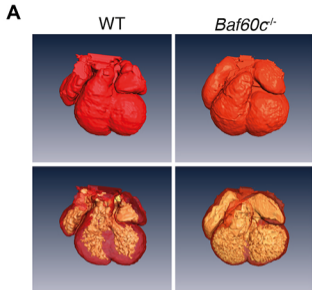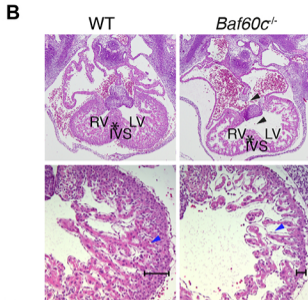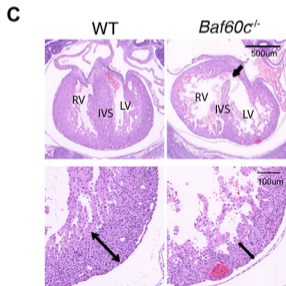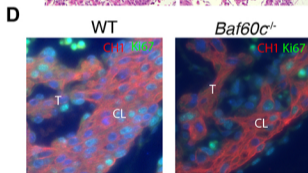

*Baf60c<sup>fl/+</sup>;Nkx2-5::Cre*

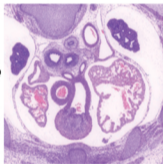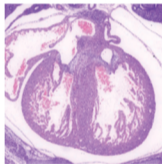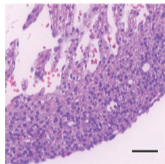

*Baf60c<sup>fl/-</sup>;Nkx2-5::Cre*

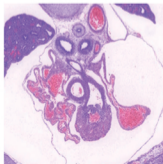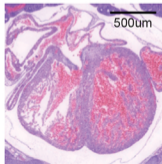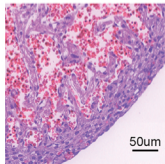

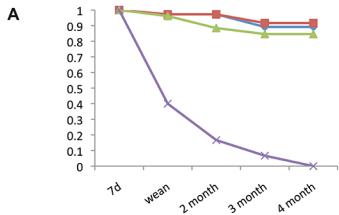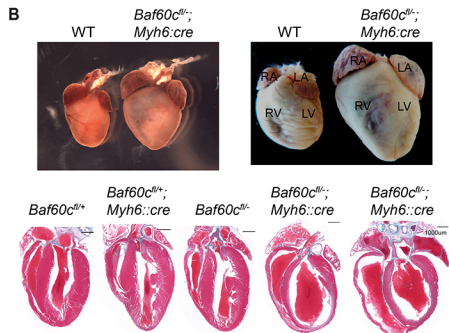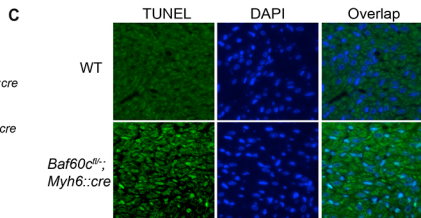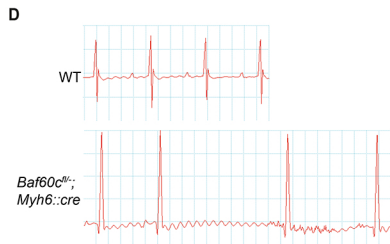

A

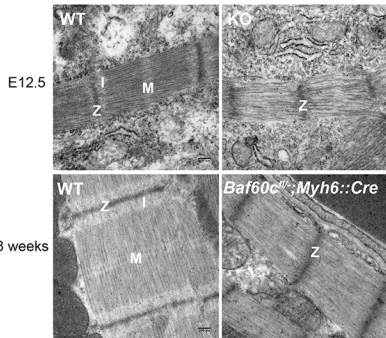

B

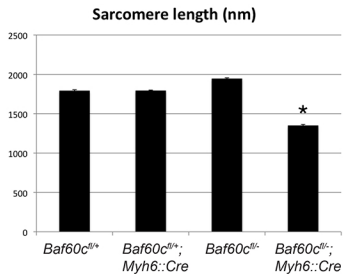

C

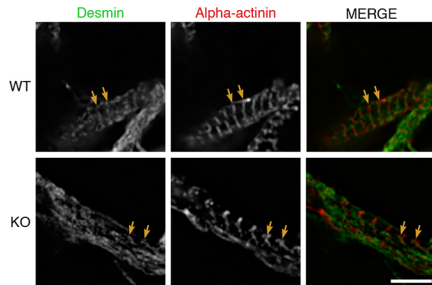

D

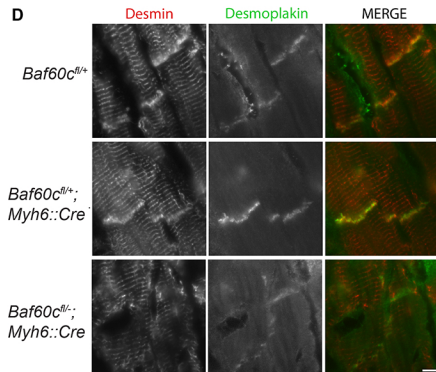

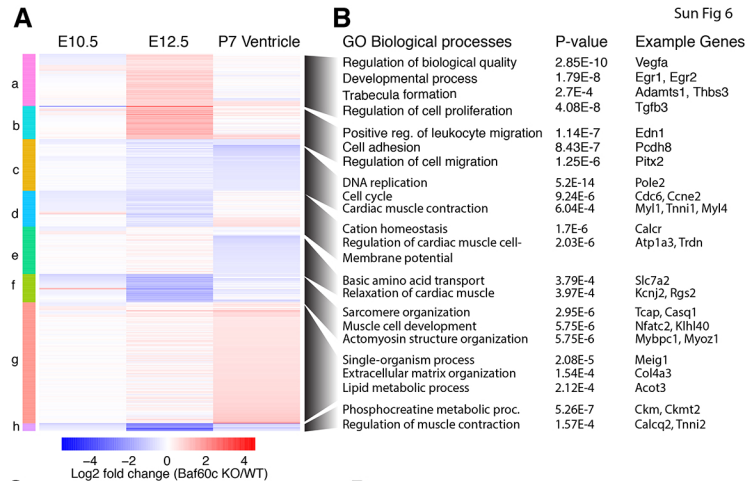

**C** GO Biological processes enriched in Baf60c repressed genes in P7 ventricles

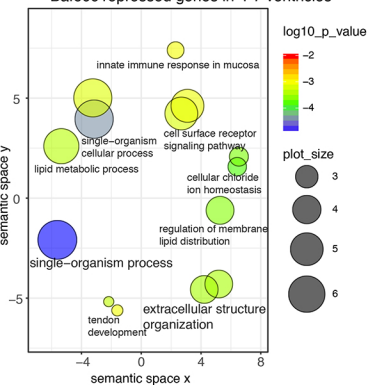

**D** GO Biological processes enriched in Baf60c activated genes in P7 ventricles

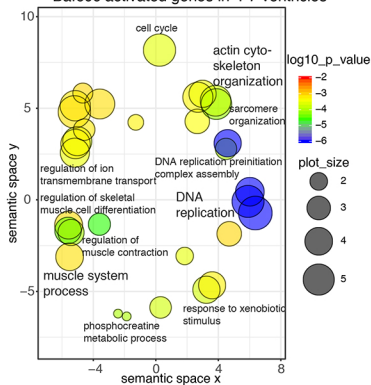

**E** Venn diagram showing the overlap of genes between D10, E10.5, E12.5, and P7 Ventricle.

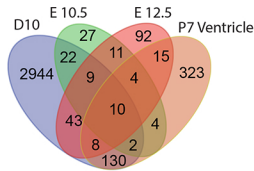

**A**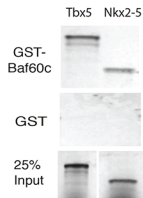**B**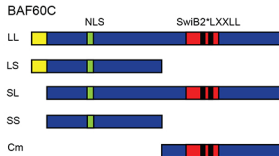

LL LS SL SS Cm

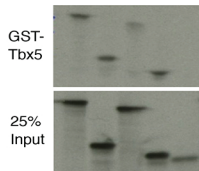**C**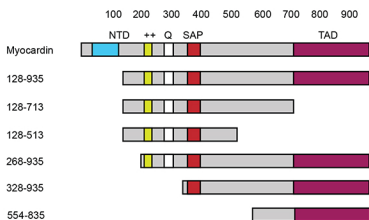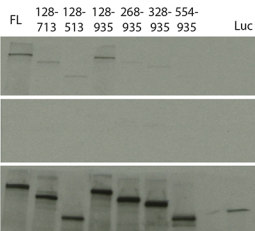**D**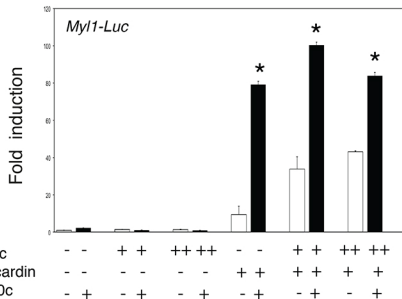

Source: https://www.biorxiv.org/content/10.1101/184143v1.full.pdf
